# Supplementary material for: Cold induced pain elicits reproducible breath metabolomic responses across geographically distinct populations
Source: iScience. 2026 Apr 22;29(6):115857. doi: 10.1016/j.isci.2026.115857 (PMC13156685; doi:10.1016/j.isci.2026.115857)
Supplement: Data S2. Compounds mapped to the top five enriched metabolic pathways identified by mummichog analysis [file mmc3.xlsx]

## Sheet: cpdsData_fromPOI_20231214
cpd	name	SameMZmode	IsInSig	m.z	AdductForm	mode	mzID	Samelog2FCDirection.ch	Avglog2FC.ch	Samelog2FCDirection.cn	Avglog2FC.cn	Pathway
C00025	L-Glutamic acid	FALSE	TRUE	146.04587 | 148.06043	M-H [1-] | M+H [1+]	negative | positive	4137 | 1156	TRUE	1.73729	TRUE	1.43699	Aminoacyl-tRNA biosynthesis | Butanoate metabolism | Alanine, aspartate and glutamate metabolism | Arginine and proline metabolism
C00037	Glycine	FALSE	FALSE	74.02475 | 76.0393	M-H [1-] | M+H [1+]	negative | positive	3743 | 44	TRUE	1.0898	TRUE	0.977043	Aminoacyl-tRNA biosynthesis
C00041	L-Alanine	FALSE	FALSE	88.0404 | 90.05496	M-H [1-] | M+H [1+]	negative | positive	3786 | 170	TRUE	1.18168	TRUE	1.13537	Aminoacyl-tRNA biosynthesis | Alanine, aspartate and glutamate metabolism
C00047	L-Lysine	TRUE	FALSE	147.113	M+H [1+]	positive	1147	TRUE	1.43474	TRUE	1.40713	Aminoacyl-tRNA biosynthesis
C00049	L-Aspartic acid	FALSE	FALSE	132.03024 | 134.04479	M-H [1-] | M+H [1+]	negative | positive	4045 | 884	TRUE	1.38549	TRUE	1.07918	Aminoacyl-tRNA biosynthesis | Alanine, aspartate and glutamate metabolism
C00062	L-Arginine	TRUE	TRUE	175.119	M+H [1+]	positive	1716	TRUE	1.89853	TRUE	1.57699	Aminoacyl-tRNA biosynthesis | Arginine and proline metabolism
C00065	L-Serine	TRUE	FALSE	106.05	M+H [1+]	positive	380	TRUE	1.25186	TRUE	1.53343	Aminoacyl-tRNA biosynthesis | Cysteine and methionine metabolism
C00079	L-Phenylalanine	FALSE	FALSE	164.07169 | 166.08625	M-H [1-] | M+H [1+]	negative | positive	4283 | 1517	TRUE	0.727948	TRUE	0.53286	Aminoacyl-tRNA biosynthesis
C00082	L-Tyrosine	FALSE	FALSE	180.06662 | 182.08117	M-H [1-] | M+H [1+]	negative | positive	4411 | 1850	TRUE	1.16805	TRUE	0.637838	Aminoacyl-tRNA biosynthesis
C00123	L-Leucine	TRUE	TRUE	132.10191 | 133.10525	M+H [1+] | M(C13)+H [1+]	positive | positive	850 | 876	TRUE	1.47529	TRUE	1.39995	Aminoacyl-tRNA biosynthesis
C00135	L-Histidine	TRUE	FALSE	156.077	M+H [1+]	positive	1326	TRUE	1.59896	TRUE	1.32115	Aminoacyl-tRNA biosynthesis
C00148	L-Proline	FALSE	TRUE	114.05605 | 116.0706 | 117.07398	M-H [1-] | M+H [1+] | M(C13)+H [1+]	negative | positive | positive	3932 | 534 | 561	TRUE	1.10181	TRUE	1.22285	Aminoacyl-tRNA biosynthesis | Arginine and proline metabolism
C00152	L-Asparagine	TRUE	TRUE	133.061	M+H [1+]	positive	867	TRUE	1.61204	TRUE	1.56014	Aminoacyl-tRNA biosynthesis | Alanine, aspartate and glutamate metabolism
C00183	L-Valine	FALSE	FALSE	116.0717 | 118.08625 | 119.08959	M-H [1-] | M+H [1+] | M(C13)+H [1+]	negative | positive | positive	3950 | 580 | 606	TRUE	0.973446	TRUE	1.41445	Aminoacyl-tRNA biosynthesis
C00188	L-Threonine	TRUE	TRUE	120.066	M+H [1+]	positive	620	TRUE	1.58371	TRUE	1.85856	Aminoacyl-tRNA biosynthesis
C00407	L-Isoleucine	TRUE	TRUE	132.10191 | 133.10525	M+H [1+] | M(C13)+H [1+]	positive | positive	850 | 876	TRUE	1.47529	TRUE	1.39995	Aminoacyl-tRNA biosynthesis
C00022	Pyruvic acid	FALSE	FALSE	87.00877 | 88.01212 | 89.02332	M-H [1-] | M(C13)-H [1-] | M+H [1+]	negative | negative | positive	3780 | 3784 | 156	TRUE	0.849564	TRUE	1.02131	Cysteine and methionine metabolism | Alanine, aspartate and glutamate metabolism | Arginine and proline metabolism
C00109	2-Ketobutyric acid	FALSE	FALSE	101.02442 | 102.02777 | 103.03897 | 104.04233	M-H [1-] | M(C13)-H [1-] | M+H [1+] | M(C13)+H [1+]	negative | negative | positive | positive	3860 | 3867 | 326 | 343	TRUE	0.818881	TRUE	1.22704	Cysteine and methionine metabolism
C02218	2-Aminoacrylic acid	FALSE	FALSE	86.02476 | 88.0393	M-H [1-] | M+H [1+]	negative | positive	3777 | 146	TRUE	0.983155	TRUE	1.25121	Cysteine and methionine metabolism
C02356	L-alpha-Aminobutyric acid	FALSE	TRUE	102.05606 | 104.0706 | 105.07396	M-H [1-] | M+H [1+] | M(C13)+H [1+]	negative | positive | positive	3869 | 347 | 364	TRUE	1.5298	TRUE	1.36611	Cysteine and methionine metabolism
C05823	3-Mercaptolactic acid	FALSE	TRUE	120.99647 | 124.01464	M-H [1-] | M(C13)+H [1+]	negative | positive	3974 | 695	TRUE	1.3741	TRUE	1.30904	Cysteine and methionine metabolism
C08276	3-Methylthiopropionic acid	TRUE	FALSE	121.032	M+H [1+]	positive	638	TRUE	1.55483	TRUE	1.00555	Cysteine and methionine metabolism
C15606	1,2-Dihydroxy-3-keto-5-methylthiopentene	TRUE	TRUE	164.046	M(C13)+H [1+]	positive	1468	TRUE	2.49098	TRUE	1.59483	Cysteine and methionine metabolism
C00026	Oxoglutaric acid	FALSE	FALSE	145.01425 | 147.02879	M-H [1-] | M+H [1+]	negative | positive	4127 | 1135	TRUE	1.32547	TRUE	1.03329	Butanoate metabolism | Alanine, aspartate and glutamate metabolism
C00042	Succinic acid	FALSE	FALSE	117.01933 | 118.02269 | 119.03389	M-H [1-] | M(C13)-H [1-] | M+H [1+]	negative | negative | positive	3955 | 3962 | 592	TRUE	1.18277	TRUE	1.05835	Butanoate metabolism | Alanine, aspartate and glutamate metabolism
C00164	Acetoacetic acid	FALSE	FALSE	101.02442 | 102.02777 | 103.03897 | 104.04233	M-H [1-] | M(C13)-H [1-] | M+H [1+] | M(C13)+H [1+]	negative | negative | positive | positive	3860 | 3867 | 326 | 343	TRUE	0.818881	TRUE	1.22704	Butanoate metabolism
C00232	Succinic acid semialdehyde	FALSE	FALSE	101.02442 | 102.02777 | 103.03897 | 104.04233	M-H [1-] | M(C13)-H [1-] | M+H [1+] | M(C13)+H [1+]	negative | negative | positive | positive	3860 | 3867 | 326 | 343	TRUE	0.818881	TRUE	1.22704	Butanoate metabolism | Alanine, aspartate and glutamate metabolism
C00246	Butyric acid	FALSE	TRUE	87.04515 | 88.04851 | 89.05971 | 90.06306	M-H [1-] | M(C13)-H [1-] | M+H [1+] | M(C13)+H [1+]	negative | negative | positive | positive	3782 | 3787 | 160 | 171	TRUE	1.1228	TRUE	0.931664	Butanoate metabolism
C00334	gamma-Aminobutyric acid	FALSE	TRUE	102.05606 | 104.0706 | 105.07396	M-H [1-] | M+H [1+] | M(C13)+H [1+]	negative | positive | positive	3869 | 347 | 364	TRUE	1.5298	TRUE	1.36611	Butanoate metabolism | Alanine, aspartate and glutamate metabolism | Arginine and proline metabolism
C01089	(R)-3-Hydroxybutyric acid	FALSE	FALSE	103.04007 | 104.04344 | 105.05462	M-H [1-] | M(C13)-H [1-] | M+H [1+]	negative | negative | positive	3875 | 3879 | 362	TRUE	0.900444	TRUE	0.825092	Butanoate metabolism
C02630	2-Hydroxyglutarate	TRUE	FALSE	147.0299 | 148.03326	M-H [1-] | M(C13)-H [1-]	negative | negative	4143 | 4150	TRUE	0.8782	TRUE	1.08846	Butanoate metabolism
C00036	Oxalacetic acid	FALSE	FALSE	130.99858 | 133.01299	M-H [1-] | M+H [1+]	negative | positive	4039 | 860	TRUE	1.00549	TRUE	1.38636	Alanine, aspartate and glutamate metabolism
C00122	Fumaric acid	FALSE	FALSE	115.00368 | 116.00703 | 117.01824	M-H [1-] | M(C13)-H [1-] | M+H [1+]	negative | negative | positive	3934 | 3943 | 548	TRUE	1.08953	TRUE	0.806403	Alanine, aspartate and glutamate metabolism
C00158	Citric acid	TRUE	FALSE	191.02	M-H [1-]	negative	4480	TRUE	1.20042	TRUE	1.27248	Alanine, aspartate and glutamate metabolism
C00402	D-Aspartic acid	FALSE	FALSE	132.03024 | 134.04479	M-H [1-] | M+H [1+]	negative | positive	4045 | 884	TRUE	1.38549	TRUE	1.07918	Alanine, aspartate and glutamate metabolism
C00438	Ureidosuccinic acid	TRUE	FALSE	177.05	M+H [1+]	positive	1745	TRUE	1.96226	TRUE	1.01845	Alanine, aspartate and glutamate metabolism
C00940	2-Keto-glutaramic acid	FALSE	FALSE	144.03023 | 146.04478	M-H [1-] | M+H [1+]	negative | positive	4118 | 1113	TRUE	1.36834	TRUE	1.23507	Alanine, aspartate and glutamate metabolism
C01042	N-Acetyl-L-aspartic acid	FALSE	TRUE	174.0408 | 176.05536	M-H [1-] | M+H [1+]	negative | positive	4372 | 1728	TRUE	1.83126	TRUE	1.416	Alanine, aspartate and glutamate metabolism
C02362	2-Oxosuccinamate	FALSE	FALSE	130.01457 | 132.02912	M-H [1-] | M+H [1+]	negative | positive	4031 | 838	TRUE	1.05896	TRUE	1.23776	Alanine, aspartate and glutamate metabolism
C00048	Glyoxylic acid	TRUE	FALSE	72.99311 | 73.99652	M-H [1-] | M(C13)-H [1-]	negative | negative	3739 | 3742	TRUE	1.04366	TRUE	1.07235	Arginine and proline metabolism
C00077	Ornithine	TRUE	FALSE	133.097	M+H [1+]	positive	873	TRUE	1.42398	TRUE	1.38117	Arginine and proline metabolism
C00300	Creatine	TRUE	TRUE	132.077	M+H [1+]	positive	846	TRUE	1.61746	TRUE	1.92208	Arginine and proline metabolism
C00555	4-Aminobutanal	TRUE	FALSE	88.07569 | 89.07904	M+H [1+] | M(C13)+H [1+]	positive | positive	150 | 162	TRUE	1.2759	TRUE	1.02395	Arginine and proline metabolism
C00763	D-Proline	FALSE	TRUE	114.05605 | 116.0706 | 117.07398	M-H [1-] | M+H [1+] | M(C13)+H [1+]	negative | positive | positive	3932 | 534 | 561	TRUE	1.10181	TRUE	1.22285	Arginine and proline metabolism
C01035	4-Guanidinobutanoic acid	TRUE	FALSE	146.092	M+H [1+]	positive	1121	TRUE	1.50259	TRUE	1.48893	Arginine and proline metabolism
C01157	4-Hydroxyproline	FALSE	FALSE	130.05096 | 132.06552	M-H [1-] | M+H [1+]	negative | positive	4034 | 844	TRUE	1.36996	TRUE	1.13345	Arginine and proline metabolism
C01165	L-Glutamic gamma-semialdehyde	FALSE	FALSE	130.05096 | 132.06552	M-H [1-] | M+H [1+]	negative | positive	4034 | 844	TRUE	1.36996	TRUE	1.13345	Arginine and proline metabolism
C02714	N-Acetylputrescine	TRUE	FALSE	131.118	M+H [1+]	positive	832	TRUE	1.28042	TRUE	1.29636	Arginine and proline metabolism
C02946	4-Acetamidobutanoic acid	FALSE	FALSE	144.06662 | 146.08117	M-H [1-] | M+H [1+]	negative | positive	4121 | 1119	TRUE	1.16715	TRUE	1.08267	Arginine and proline metabolism
C03440	cis-4-Hydroxy-D-proline	FALSE	FALSE	130.05096 | 132.06552	M-H [1-] | M+H [1+]	negative | positive	4034 | 844	TRUE	1.36996	TRUE	1.13345	Arginine and proline metabolism
C03564	1-Pyrroline-2-carboxylic acid	FALSE	FALSE	112.0404 | 113.04376 | 114.05495 | 115.05833	M-H [1-] | M(C13)-H [1-] | M+H [1+] | M(C13)+H [1+]	negative | negative | positive | positive	3915 | 3923 | 497 | 513	TRUE	0.993069	TRUE	1.10274	Arginine and proline metabolism
C04281	Pyrroline hydroxycarboxylic acid	FALSE	FALSE	128.03532 | 129.03867 | 130.04987	M-H [1-] | M(C13)-H [1-] | M+H [1+]	negative | negative | positive	4021 | 4028 | 805	TRUE	1.22954	TRUE	1.09246	Arginine and proline metabolism
C04282	1-Pyrroline-4-hydroxy-2-carboxylate	FALSE	FALSE	128.03532 | 129.03867 | 130.04987	M-H [1-] | M(C13)-H [1-] | M+H [1+]	negative | negative | positive	4021 | 4028 | 805	TRUE	1.22954	TRUE	1.09246	Arginine and proline metabolism
C05147	Trans-3-hydroxy-L-proline	FALSE	FALSE	130.05096 | 132.06552	M-H [1-] | M+H [1+]	negative | positive	4034 | 844	TRUE	1.36996	TRUE	1.13345	Arginine and proline metabolism
C05936	N4-Acetylaminobutanal	TRUE	FALSE	130.086	M+H [1+]	positive	811	TRUE	0.967995	TRUE	0.950895	Arginine and proline metabolism
C05938	L-4-Hydroxyglutamate semialdehyde	FALSE	TRUE	146.04587 | 148.06043	M-H [1-] | M+H [1+]	negative | positive	4137 | 1156	TRUE	1.73729	TRUE	1.43699	Arginine and proline metabolism
C05946	D-4-Hydroxy-2-oxoglutarate	TRUE	FALSE	161.009	M-H [1-]	negative	4259	TRUE	0.877589	TRUE	1.2651	Arginine and proline metabolism
C05947	L-erythro-4-hydroxyglutamic acid	TRUE	FALSE	164.055	M+H [1+]	positive	1470	TRUE	1.45514	TRUE	1.96705	Arginine and proline metabolism
